# Supplementary material
Source: publisher site journal article supplement (https://www.dovepress.com/article/595522)
Supplement: Supplementary file 1 [file 595522%20Supplementary%20Materials.doc]

**Supplementary Table 1. Coding of Categorical Variables**

| Variable | Assignment Description |
| --- | --- |
| Sex | 1 = Male, 2 = Female (Female as the reference category) |
| Pathological Type | 1 = Type A, 2 = Type B (Type B as the reference category) |
| Tumor Stage | 1 = StageⅠ-Ⅱ, 2 = Stage Ⅲ-Ⅳ (StageⅢ-Ⅳ as the reference category) |
| Serum LDH | 0 = Normal, 1 = Elevated (Normal as the reference category) |
| IPI Score | 0 = <20 points, 1 = ≥21 points (<20 points as the reference category) |
| Chemotherapy Cycles | 0 = Insufficient, 1 = Full course (Insufficient as the reference category) |
| B Symptoms | 0 = Absent, 1 = Present (Absent as the reference category) |
| Age, AXL, Gas6, PCT | Continuous variables, entered as original values |

**Supplementary Table 2. Stepwise Regression Model Fitting Process**

| Step | Variable Entered | Log Likelihood | χ2 | df | P | Δχ2 | P |
| --- | --- | --- | --- | --- | --- | --- | --- |
| 1 | AXL | 178.861 | 26.691 | 1 | <0.001 | 26.691 | <0.001 |
| 2 | +Gas6 | 166.386 | 42.093 | 2 | <0.001 | 12.475 | <0.001 |
| 3 | +B Symptoms | 162.269 | 46.66 | 3 | <0.001 | 4.117 | 0.042 |
